# Supplementary material for: PGF2α‐FP Receptor Ameliorates Senescence of VSMCs in Vascular Remodeling by Src/PAI‐1 Signal Pathway
Source: Hindawi journal article supplement (doi:10.1155/2022/2908261), 2022-01-01
Supplement: f1 [file 2908261.f1.pdf]

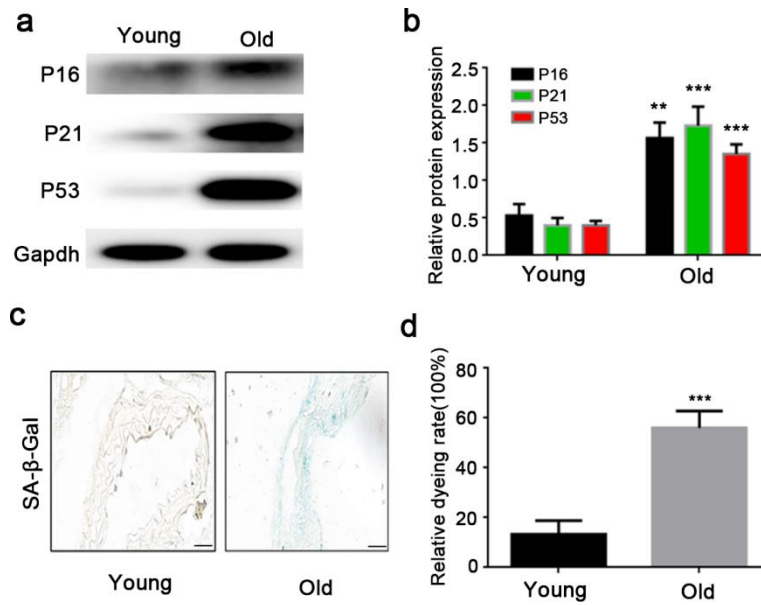

**Supplementary Figure.1 Establishment of natural aging mice model.** WT C57 mice were divided into young and old group. (a) Representative Western blot of P16, P21, and P53; (b) Western blot analysis of P16, P21, and P53; (c) Representative  $\beta$ -galactosidase staining with the aorta from the mice (scale bar: 20 $\mu$ m); (d) Analysis of the relative dyeing rate. \* $P$ <0.05, \*\* $P$ <0.01 and \*\*\* $P$ <0.001 vs Young Group; n=5.

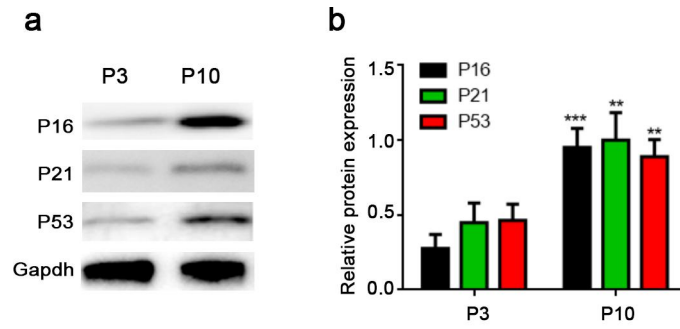

**Supplementary Figure.2 Establishment of VSMCs replicatively senescence models.** (a) Representative Western blot of P16, P21, and P53 in different groups; (b) Quantitative analysis of Figure a; \* $P<0.05$ , \*\* $P<0.01$  and \*\*\* $P<0.001$  vs P3 Group.

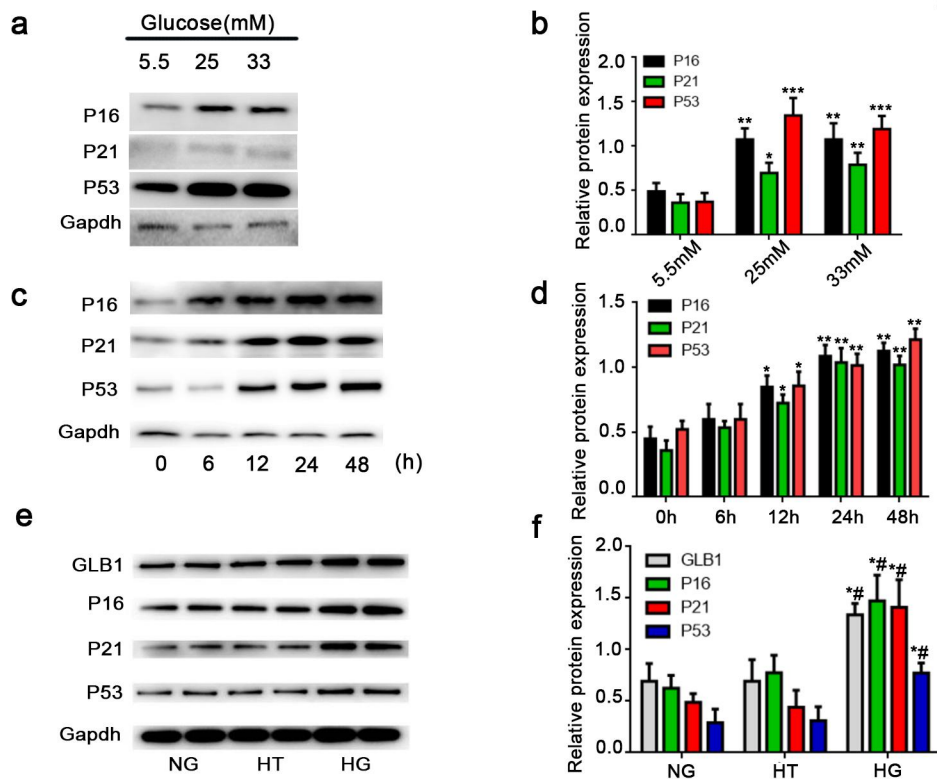

**Supplementary Figure.3 Establishment of induced senescence model.** The senescence model of VSMCs was established by selecting appropriate concentration and time of glucose stimulation. (a) Representative Western blot of P16, P21, and P53 in different glucose groups; (b) Quantitative analysis of Figure a; (c) Western blot of P16, P21, and P53 protein expressions in VSMCs under 33mM glucose for indicated time; (d) Quantitative analysis of Figure c; (e) The effect of high glucose on the expressions of GLB1, P16, P21 and P53 detected by Western bolt; (f) Quantitative analysis of Figure e. \* $P < 0.05$ , \*\* $P < 0.01$ , \*\*\* $P < 0.001$  vs NG Group; # $P < 0.05$  vs Hypertonic (HT) Group.

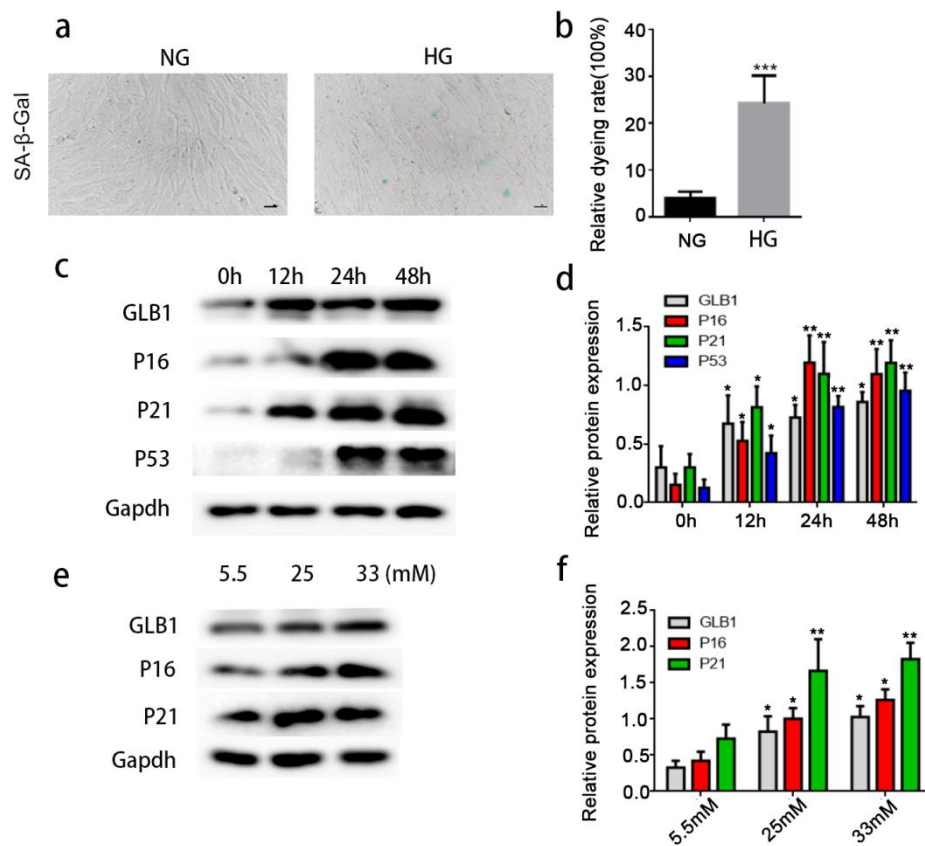

**Supplementary Figure.4 High glucose stimulated HASMCs to induce cell senescence.** (a) Representative  $\beta$ -galactosidase staining with the HASMCs (scale bar: 20 $\mu$ m); (b) Analysis of the relative dyeing rate; (c) Representative Western blot of GLB1, P16, P21, and P53 in different glucose groups; (d) Quantitative analysis of different glucose groups; (e) Representative Western blot of different glucose groups; (f) Quantitative analysis of Figure e; \* $P$ <0.05, \*\* $P$ <0.01 and \*\*\* $P$ <0.001 vs Control Group.

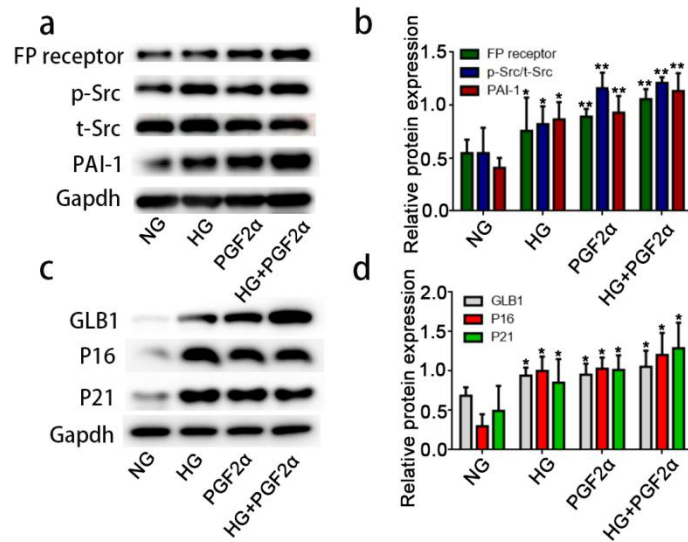

**Supplementary Figure.5 Effects of high glucose and PGF2 $\alpha$  stimulation on the FP receptor/Src/PAI-1 pathway and aging-related proteins of HASMCs.** (a) Representative Western blot of FP receptor, p-Src, t-Src, PAI-1 in different groups; (b) Quantitative analysis of Figure a; (c) Representative Western blot of GLB1, P16 and P21 in different groups; (d) Quantitative analysis of Figure e; \* $P < 0.05$  and \*\* $P < 0.01$  vs NG Group.

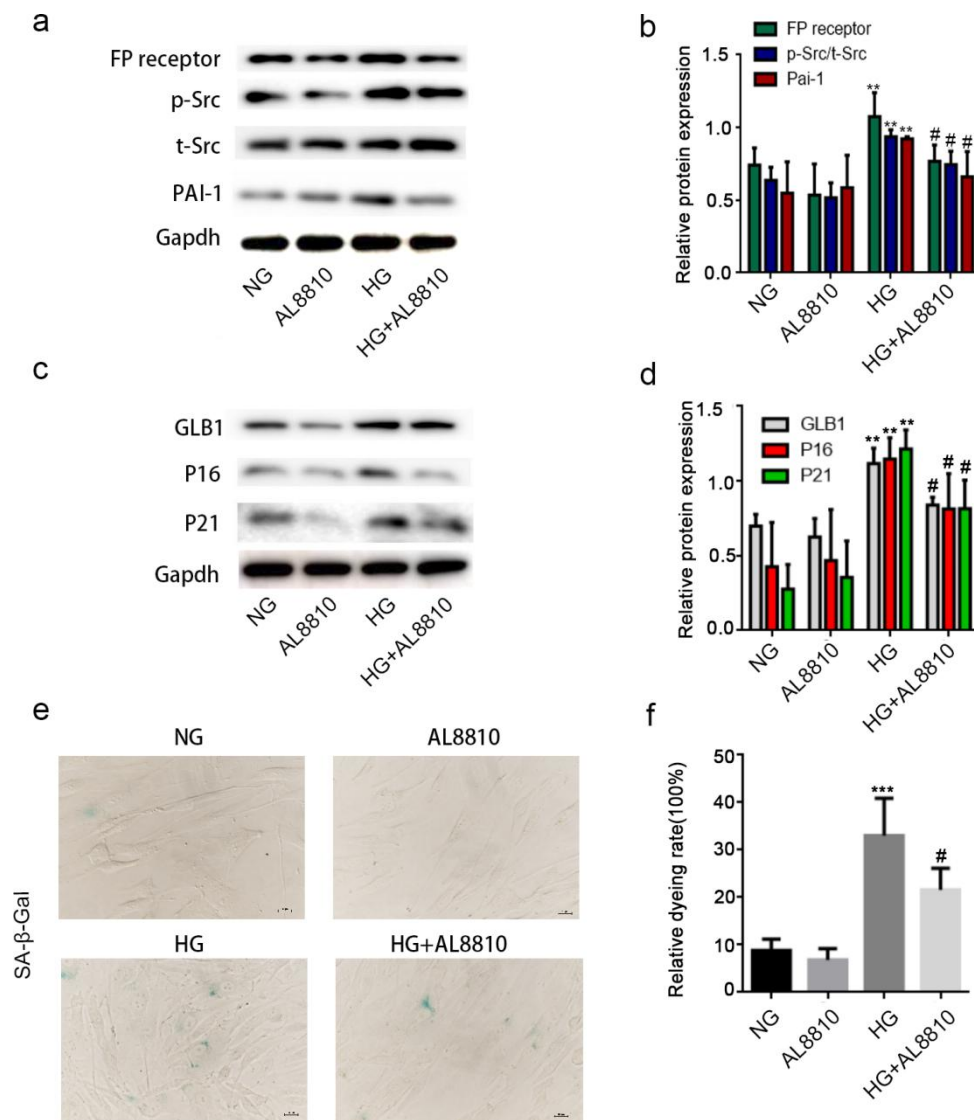

**Supplementary Figure.6 Effects of inhibition of FP receptor expression in HASMCs on Src/PAI-1 pathways and cells senescence.** (a) Representative Western blot of FP receptor, p-Src, t-Src, PAI-1 in different groups; (b) Quantitative analysis of Figure a; (c) Representative Western blot of GLB1, P16 and P21 in different groups; Representative  $\beta$ -galactosidase staining with the HASMCs (scale bar: 20 $\mu$ m); (f) Analysis of the relative dyeing rate; \* $P$ <0.05, \*\* $P$ <0.01 and \*\*\* $P$ <0.001 vs NG Group ; # $P$ <0.05 vs HG Group.
